# Supplementary material
Source: publisher figshare collection journal article supplement (https://acs.figshare.com/ndownloader/files/3746056)
Supplement: Supplementary file 1 [file 3746056]

## Monitoring the response of the human urinary metabolome to brief maximal exercise by a combination of RP-UPLC-MS and $^1\text{H}$ NMR spectroscopy

Alexandros Pechlivanis<sup>§,†,⊥</sup>, Konstantinos G. Papaioannou, <sup>‡</sup> George Tsalis, <sup>‡</sup> Ploutarchos Saraslanidis, <sup>‡</sup> Vassilis Mougios<sup>‡,¶</sup> and Georgios A. Theodoridis<sup>‡,\*</sup>

<sup>§</sup> Biomolecular Medicine, Division of Computational and Systems Medicine, Department of Surgery and Cancer, Faculty of Medicine, Imperial College London, SW7 2AZ, London, U. K.

<sup>†</sup> School of Chemistry, Aristotle University of Thessaloniki, 54124 Greece

<sup>‡</sup> School of Physical Education and Sport Science at Thessaloniki, Aristotle University of Thessaloniki, 54124 Greece

### Table of Contents

Table S1. Changes in human urine metabolite levels, identified by  $^1\text{H}$  NMR spectroscopy, after maximal intermittent exercise. Data are mean  $\pm$  sd, relative to the mean of pre-exercise.

Table S2. Summary of model characteristics from OPLS-DA multivariate statistical analyses of data obtained from all RP-UPLC-MS analyses and the  $^1\text{H}$  NMR analysis.

Figure S1. Scores plots after PCA of the data obtained by RP-UPLC-MS analysis, at ESI+ mode and ESI- mode

Figure S2. S-plot from the OPLS-DA model on the basis of RP-UPLC-MS ESI+ data, comparing the baseline samples with the samples obtained 1 h after exercise

Figure S3. Mass spectra of hypoxanthine

Figure S4. Scores plot from the OPLS-DA model on the basis of RP-UPLC-MS ESI- data, comparing, in pairwise fashion, the baseline samples

Figure S5. Median  $^1\text{H}$  NMR spectra of urine samples

Figure S6. Characteristic  $^1\text{H}$  NMR spectral regions from the urine samples of one individual, obtained at baseline, and 1, 1.5, as well as 2 h post-exercise.

Figure S7. Scores plot for the OPLS-DA model on the basis of  $^1\text{H}$  NMR data, comparing baseline samples with those at 1.5 h after exercise

Figure S8. Top panel: scores plot for the OPLS-DA model on the basis of  $^1\text{H}$  NMR data, comparing baseline samples with those at 2 h after exercise

Figure S9. Top panel: scores plot for the OPLS-DA model on the basis of  $^1\text{H}$  NMR data, comparing samples at 1 h with those at 2 h after exercise

Table S1. Changes in human urine metabolite levels, identified by  $^1\text{H}$  NMR spectroscopy, after maximal intermittent exercise. Data are mean  $\pm$  sd, relative to the mean of pre-exercise.

| Metabolite key | Metabolite                     | Pre-exercise    | 1 h post-exercise  | 1.5 h post-exercise | 2 h post-exercise |
|----------------|--------------------------------|-----------------|--------------------|---------------------|-------------------|
| M1             | 2-Hydroxyisovalerate           | 1.00 $\pm$ 0.24 | 1.48 $\pm$ 0.43    | 0.97 $\pm$ 0.22     | 1.00 $\pm$ 0.48   |
| M2             | 2-Hydroxybutyrate              | 1.00 $\pm$ 0.24 | 2.29 $\pm$ 0.79    | 1.15 $\pm$ 0.34     | 1.00 $\pm$ 0.31   |
| M3             | 2-Oxoisocaproate               | 1.00 $\pm$ 0.10 | 1.90 $\pm$ 0.49    | 1.16 $\pm$ 0.28     | 0.99 $\pm$ 0.39   |
| M4             | 3-Methyl-2-oxovalerate         | 1.00 $\pm$ 0.21 | 2.23 $\pm$ 0.48    | 1.27 $\pm$ 0.39     | 0.99 $\pm$ 0.53   |
| M5             | Valine                         | 1.00 $\pm$ 0.14 | 0.89 $\pm$ 0.09    | 0.91 $\pm$ 0.12     | 1.01 $\pm$ 0.28   |
| M6             | Isoleucine                     | 1.00 $\pm$ 0.13 | 0.99 $\pm$ 0.09    | 0.88 $\pm$ 0.11     | 0.99 $\pm$ 0.31   |
| M7             | 3-Hydroxyisobutyrate           | 1.00 $\pm$ 0.17 | 1.97 $\pm$ 0.57    | 1.21 $\pm$ 0.37     | 0.99 $\pm$ 0.37   |
| M8             | 2-Oxoisovalerate               | 1.00 $\pm$ 0.11 | 1.11 $\pm$ 0.09    | 0.98 $\pm$ 0.14     | 0.93 $\pm$ 0.30   |
| M9             | 3-Hydroxybutyrate              | 1.00 $\pm$ 0.21 | 1.43 $\pm$ 0.36    | 1.00 $\pm$ 0.13     | 0.98 $\pm$ 0.18   |
| M10            | Lactate                        | 1.00 $\pm$ 0.16 | 191.32 $\pm$ 61.04 | 18.15 $\pm$ 25.17   | 3.15 $\pm$ 5.33   |
| M11            | 2-Hydroxyisobutyrate           | 1.00 $\pm$ 0.34 | 2.61 $\pm$ 0.88    | 1.30 $\pm$ 0.40     | 1.04 $\pm$ 0.33   |
| M12            | Alanine                        | 1.00 $\pm$ 0.16 | 1.46 $\pm$ 0.31    | 0.97 $\pm$ 0.19     | 0.83 $\pm$ 0.13   |
| M13            | Acetate                        | 1.00 $\pm$ 0.20 | 1.81 $\pm$ 0.53    | 1.27 $\pm$ 0.30     | 1.04 $\pm$ 0.18   |
| M14            | Acetoacetate                   | 1.00 $\pm$ 0.08 | 1.08 $\pm$ 0.12    | 1.02 $\pm$ 0.08     | 1.10 $\pm$ 0.17   |
| M15            | Oxaloacetate                   | 1.00 $\pm$ 0.35 | 0.93 $\pm$ 0.20    | 0.94 $\pm$ 0.34     | 0.96 $\pm$ 0.36   |
| M16            | Pyruvate                       | 1.00 $\pm$ 0.10 | 9.87 $\pm$ 3.90    | 1.52 $\pm$ 0.99     | 1.08 $\pm$ 0.27   |
| M17            | Succinate                      | 1.00 $\pm$ 0.28 | 0.69 $\pm$ 0.15    | 0.92 $\pm$ 0.33     | 0.83 $\pm$ 0.18   |
| M18            | Citrate                        | 1.00 $\pm$ 0.36 | 0.65 $\pm$ 0.20    | 1.10 $\pm$ 0.33     | 0.96 $\pm$ 0.40   |
| M19            | Dimethylamine                  | 1.00 $\pm$ 0.25 | 0.89 $\pm$ 0.10    | 1.00 $\pm$ 0.18     | 0.85 $\pm$ 0.17   |
| M20            | Trimethylamine                 | 1.00 $\pm$ 0.42 | 0.81 $\pm$ 0.27    | 0.94 $\pm$ 0.33     | 0.83 $\pm$ 0.28   |
| M21            | 2-Oxoglutarate                 | 1.00 $\pm$ 0.26 | 0.85 $\pm$ 0.14    | 0.89 $\pm$ 0.20     | 0.83 $\pm$ 0.17   |
| M22            | Creatinine                     | 1.00 $\pm$ 0.22 | 0.89 $\pm$ 0.11    | 0.96 $\pm$ 0.17     | 0.80 $\pm$ 0.16   |
| M23            | Malonate                       | 1.00 $\pm$ 0.62 | 1.04 $\pm$ 0.45    | 1.01 $\pm$ 0.47     | 1.22 $\pm$ 1.15   |
| M24            | Carnitine                      | 1.00 $\pm$ 0.56 | 0.88 $\pm$ 0.42    | 1.09 $\pm$ 0.57     | 0.93 $\pm$ 0.50   |
| M25            | Trimethylamine <i>N</i> -oxide | 1.00 $\pm$ 0.29 | 0.81 $\pm$ 0.37    | 0.90 $\pm$ 0.21     | 0.79 $\pm$ 0.24   |
| M26            | Taurine                        | 1.00 $\pm$ 0.38 | 0.79 $\pm$ 0.28    | 1.01 $\pm$ 0.43     | 0.90 $\pm$ 0.42   |
| M27            | Glycine                        | 1.00 $\pm$ 0.24 | 0.60 $\pm$ 0.11    | 0.78 $\pm$ 0.17     | 0.70 $\pm$ 0.20   |
| M28            | Allantoin                      | 1.00 $\pm$ 0.33 | 0.88 $\pm$ 0.34    | 1.01 $\pm$ 0.35     | 1.02 $\pm$ 0.61   |
| M31            | Fumarate                       | 1.00 $\pm$ 0.23 | 1.80 $\pm$ 0.45    | 1.18 $\pm$ 0.66     | 2.00 $\pm$ 1.50   |
| M32            | <i>trans</i> -Aconitate        | 1.00 $\pm$ 0.19 | 1.08 $\pm$ 0.30    | 1.17 $\pm$ 0.39     | 1.39 $\pm$ 0.66   |
| M33            | 4-Aminohippurate               | 1.00 $\pm$ 0.41 | 0.65 $\pm$ 0.25    | 0.83 $\pm$ 0.34     | 0.71 $\pm$ 0.53   |
| M34            | Tyrosine                       | 1.00 $\pm$ 0.22 | 0.78 $\pm$ 0.16    | 1.00 $\pm$ 0.43     | 0.92 $\pm$ 0.37   |
| M35            | Hippurate                      | 1.00 $\pm$ 0.61 | 0.69 $\pm$ 0.33    | 0.65 $\pm$ 0.29     | 0.58 $\pm$ 0.24   |
| M37            | Hypoxanthine                   | 1.00 $\pm$ 0.77 | 15.37 $\pm$ 4.85   | 17.39 $\pm$ 7.74    | 9.62 $\pm$ 5.01   |
| M38            | Inosine                        | 1.00 $\pm$ 0.38 | 10.93 $\pm$ 10.30  | 5.91 $\pm$ 7.58     | 3.94 $\pm$ 4.15   |
| M39            | Formate                        | 1.00 $\pm$ 0.33 | 0.50 $\pm$ 0.19    | 0.86 $\pm$ 0.38     | 1.22 $\pm$ 0.41   |

Table S2. Summary of model characteristics from OPLS-DA multivariate statistical analyses of data obtained from all RP-UPLC-MS analyses and the <sup>1</sup>H NMR analysis.

| Comparisons  | Analysis           | Components (predictive + orthogonal) | R <sup>2</sup> X | R <sup>2</sup> Y | Q <sup>2</sup> Y | CV-ANOVA, <i>P</i> value   |
|--------------|--------------------|--------------------------------------|------------------|------------------|------------------|----------------------------|
| Pre vs 1 h   | LC +               | 1 + 2                                | 0.307            | 0.946            | 0.869            | 9.35 x 10 <sup>-024</sup>  |
| Pre vs 1 h   | LC -               | 1 + 3                                | 0.339            | 0.951            | 0.861            | 7.50 x 10 <sup>-021</sup>  |
| Pre vs 1.5 h | LC +               | 1 + 3                                | 0.39             | 0.923            | 0.746            | 7.92 x 10 <sup>-014</sup>  |
| Pre vs 1.5 h | LC -               | 1 + 3                                | 0.333            | 0.911            | 0.622            | 4.11 x 10 <sup>-009</sup>  |
| Pre vs 2 h   | LC +               | 1 + 3                                | 0.557            | 0.920            | 0.715            | 1.69 x 10 <sup>-012</sup>  |
| Pre vs 2 h   | LC -               | 1 + 3                                | 0.431            | 0.897            | 0.658            | 3.22 x 10 <sup>-010</sup>  |
| 1 h vs 1.5 h | LC +               | 1 + 4                                | 0.441            | 0.944            | 0.733            | 3.25 x 10 <sup>-012</sup>  |
| 1 h vs 1.5 h | LC -               | 1 + 3                                | 0.268            | 0.904            | 0.680            | 2.09 x 10 <sup>-011</sup>  |
| 1 h vs 2 h   | LC +               | 1 + 4                                | 0.594            | 0.977            | 0.880            | 2.47 x 10e <sup>-021</sup> |
| 1 h vs 2 h   | LC -               | 1 + 3                                | 0.405            | 0.938            | 0.793            | 1.64 x 10 <sup>-016</sup>  |
| Pre vs 1 h   | <sup>1</sup> H NMR | 1 + 1                                | 0.373            | 0.764            | 0.595            | 3.23 x 10 <sup>-011</sup>  |
| Pre vs 1.5 h | <sup>1</sup> H NMR | 1 + 3                                | 0.414            | 0.949            | 0.520            | 1.11 x 10 <sup>-006</sup>  |
| Pre vs 2 h   | <sup>1</sup> H NMR | 1 + 4                                | 0.506            | 0.979            | 0.523            | 7.58 x 10 <sup>-006</sup>  |
| 1 h vs 1.5 h | <sup>1</sup> H NMR | 1 + 1                                | 0.36             | 0.643            | 0.422            | 9.67 x 10 <sup>-007</sup>  |
| 1 h vs 2 h   | <sup>1</sup> H NMR | 1 + 1                                | 0.455            | 0.727            | 0.624            | 3.54 x 10 <sup>-012</sup>  |

Pre: pre-exercise. 1 h, 1.5 h, 2 h: 1, 1.5, 2 h post-exercise. LC +, LC - : RP-UPLC-MS in ESI+ and ESI- modes.

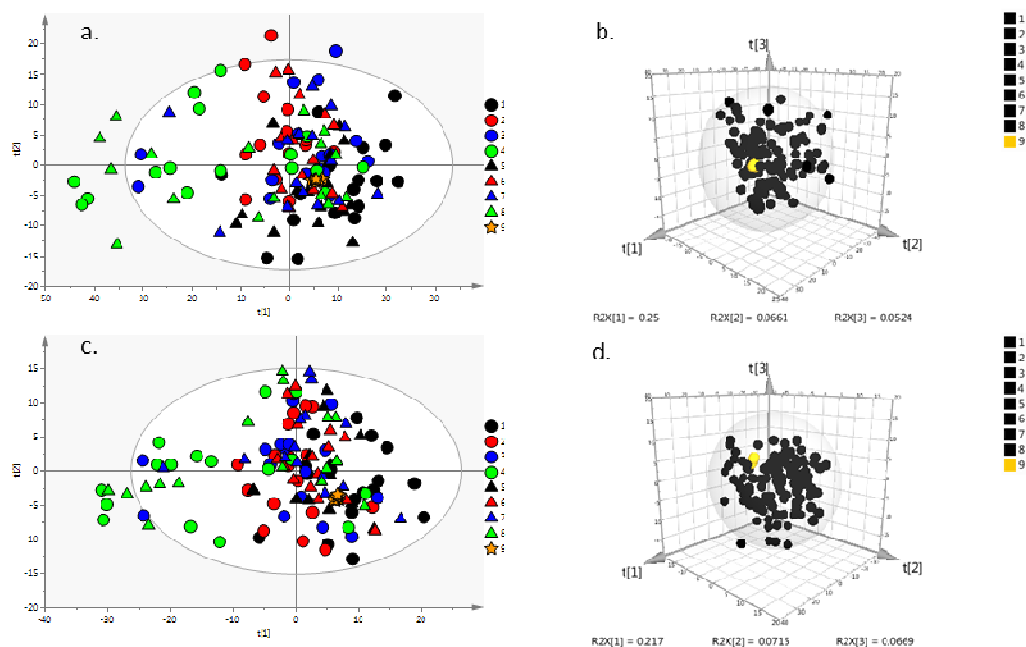

**Figure S1.** Scores plots after PCA of the data obtained by RP-UPLC-MS analysis, at ESI+ mode (a and b) and ESI- mode (c and d), of urine samples from 17 men, taken at baseline and up to 2 h after three 80-m sprint runs, performed twice on separate days (test-retest). a, c, two-dimensional scores plots (PC1 vs PC2): ● test, baseline; ● test, 1 h post-exercise; ● test, 1.5 h post-exercise; ● test, 2 h post-exercise; ▲ retest, baseline; ▲ retest, 1 h post-exercise; ▲ retest, 1.5 h post-exercise; ▲ retest, 2 h post-exercise; ★ QC samples. b, d, three-dimensional scores plots (PC1 vs PC2 vs PC3): ● all experimental samples; ★ QC samples.

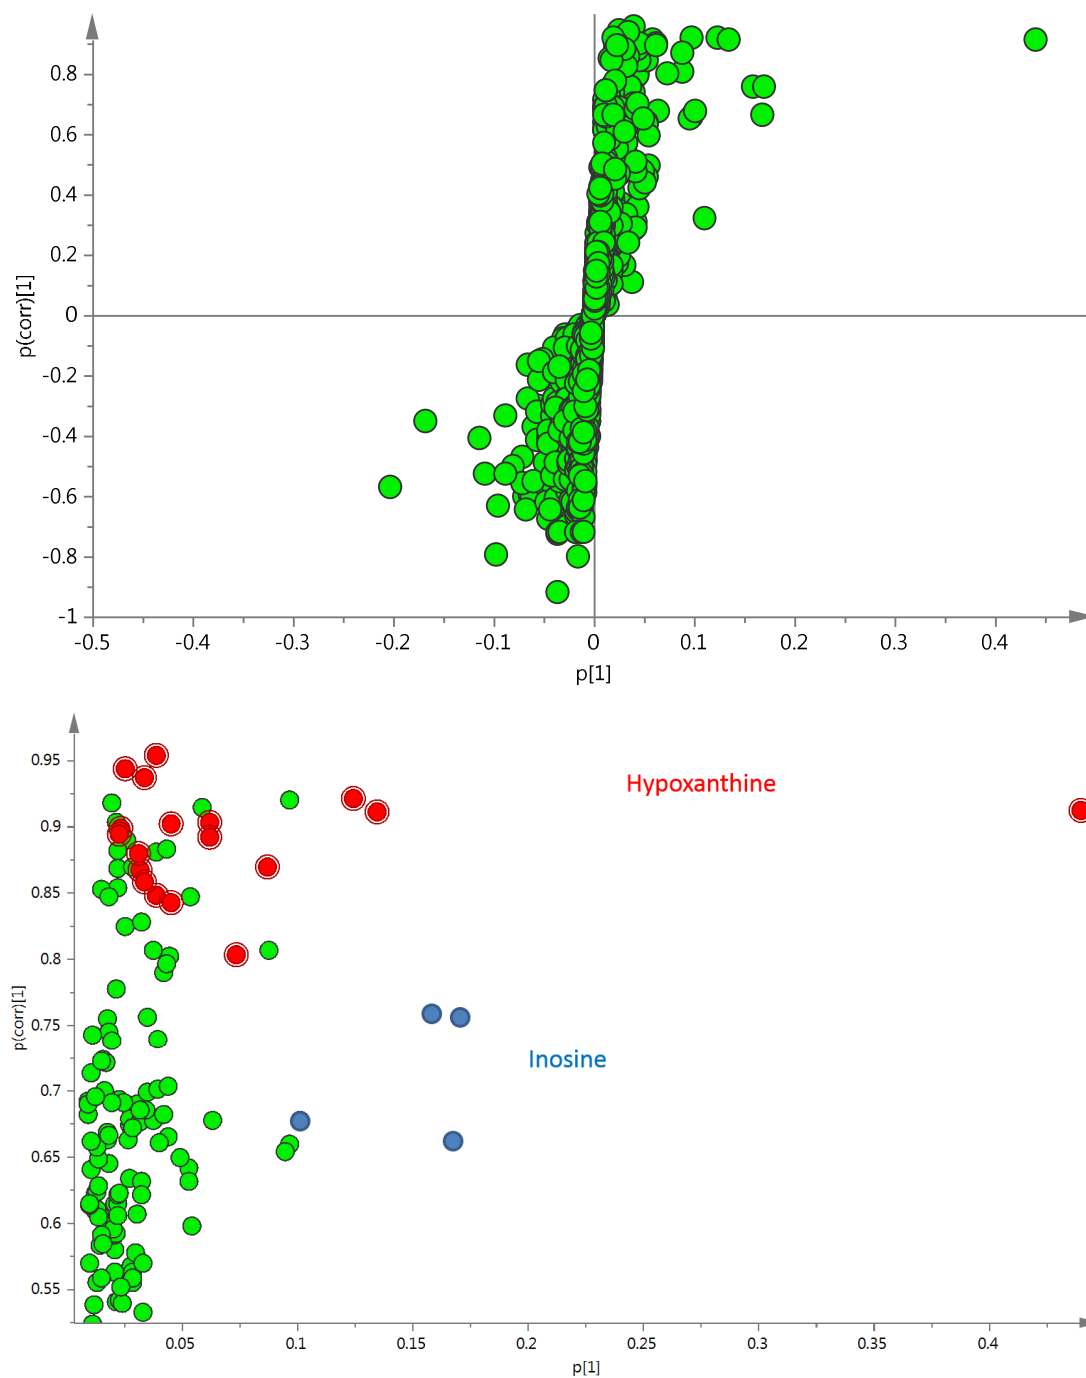

**Figure S2.** S-plot from the OPLS-DA model on the basis of RP-UPLC-MS ESI+ data, comparing the baseline samples with the samples obtained 1 h after exercise. In the expanded view (lower panel), we highlight the features that are assigned to hypoxanthine and inosine and that are increased post-exercise.

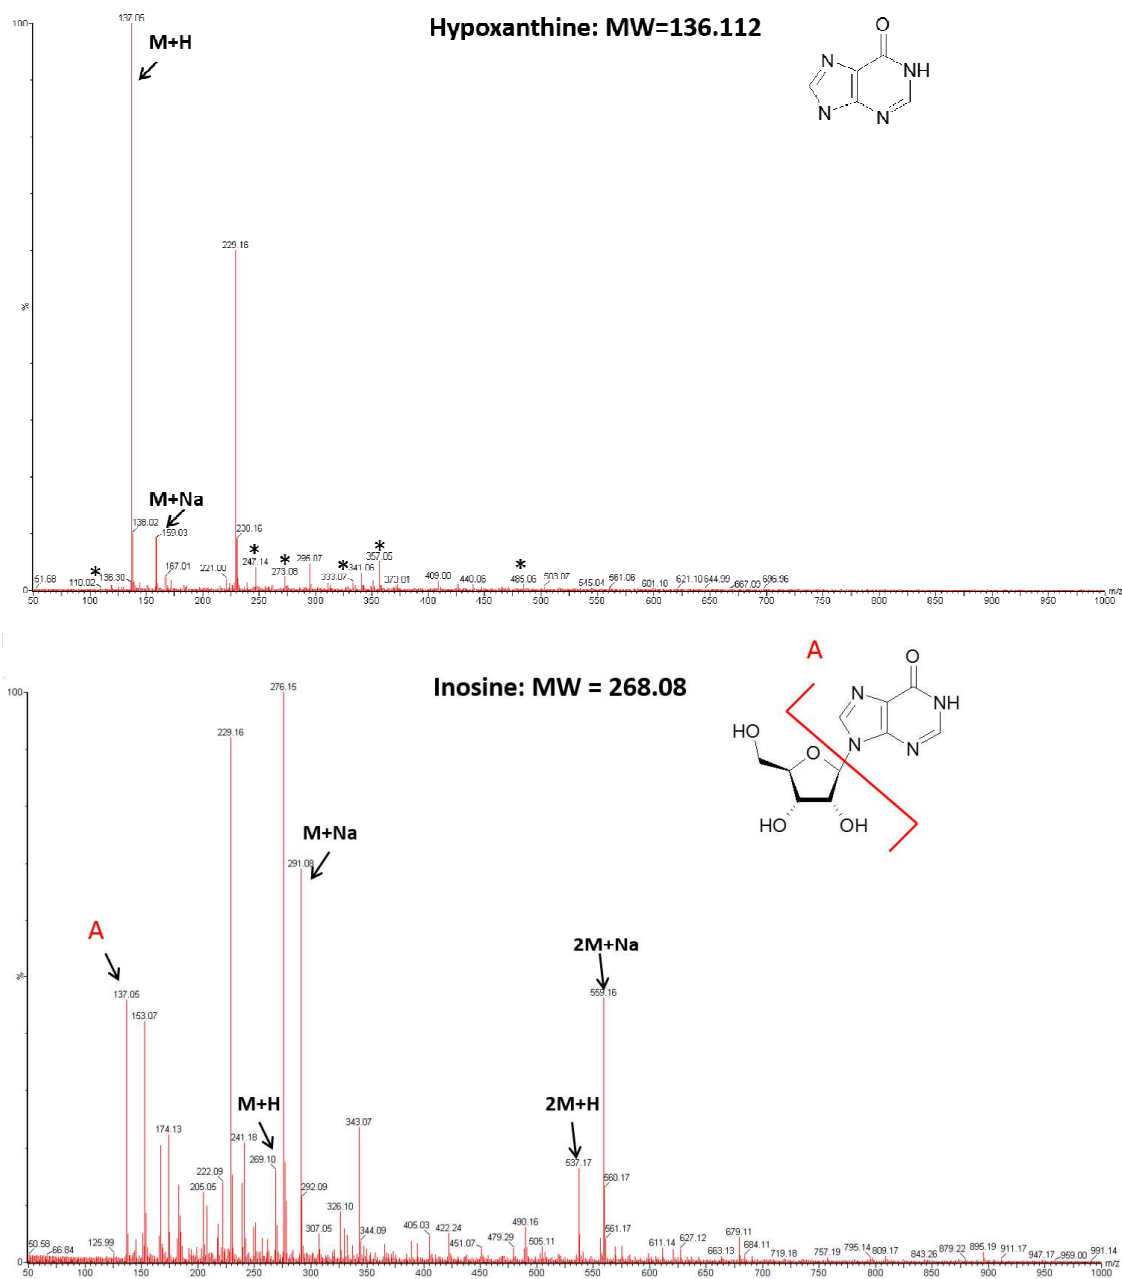

**Figure S3.** Mass spectra of hypoxanthine and inosine with the identified fragments and adducts that were found significant in the OPLS-DA models. Asterisks denote unidentified features.

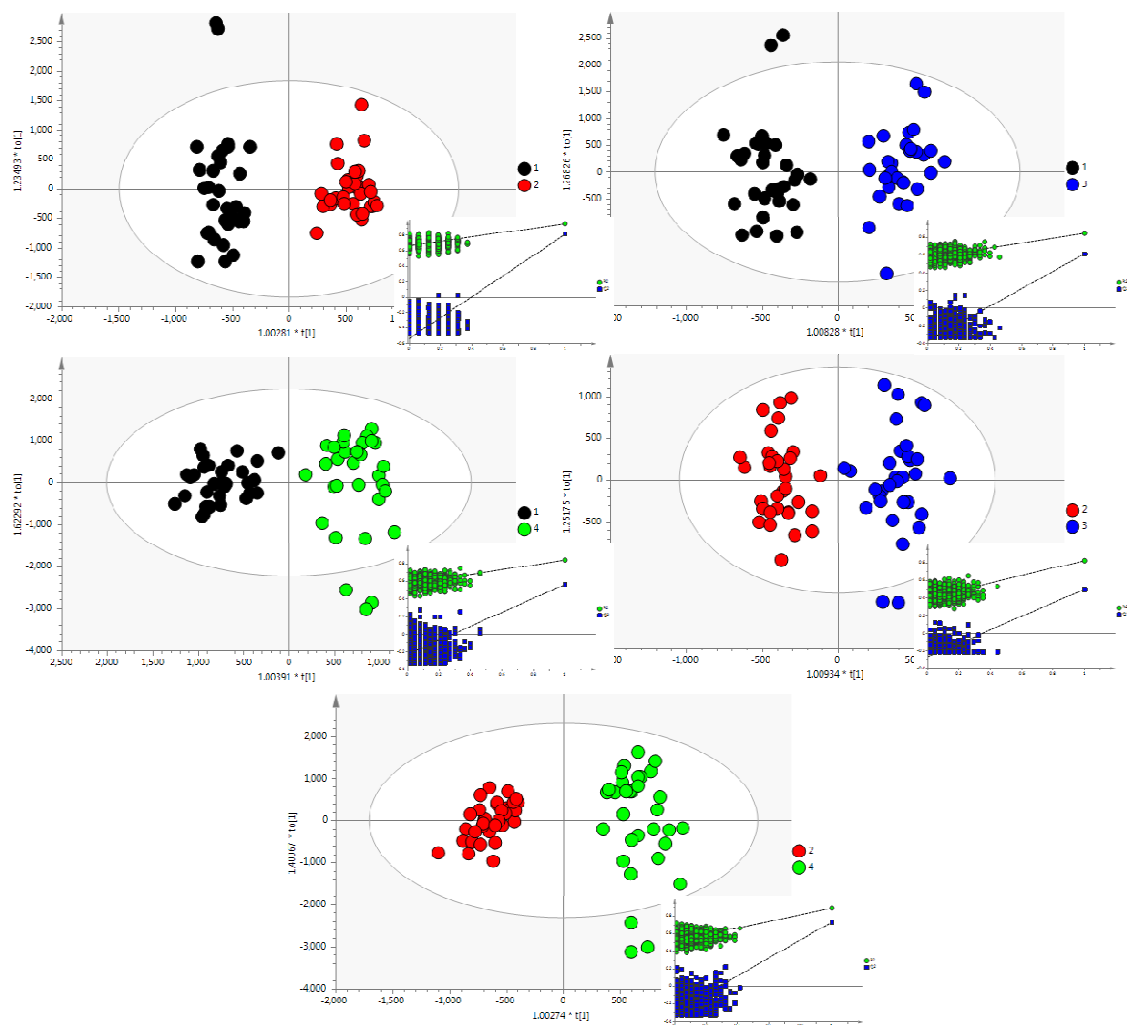

Figure S4. Scores plot from the OPLS-DA model on the basis of RP-UPLC-MS ESI- data, comparing, in pairwise fashion, the baseline samples (●), the samples obtained 1 h after exercise (●), the samples obtained 1.5 h after exercise (●), and the samples obtained 2 h after exercise (●). Inserts depict the permutation plots for each OPLS-DA model. No valid model could be constructed for the comparison of 1.5 and 2 h.

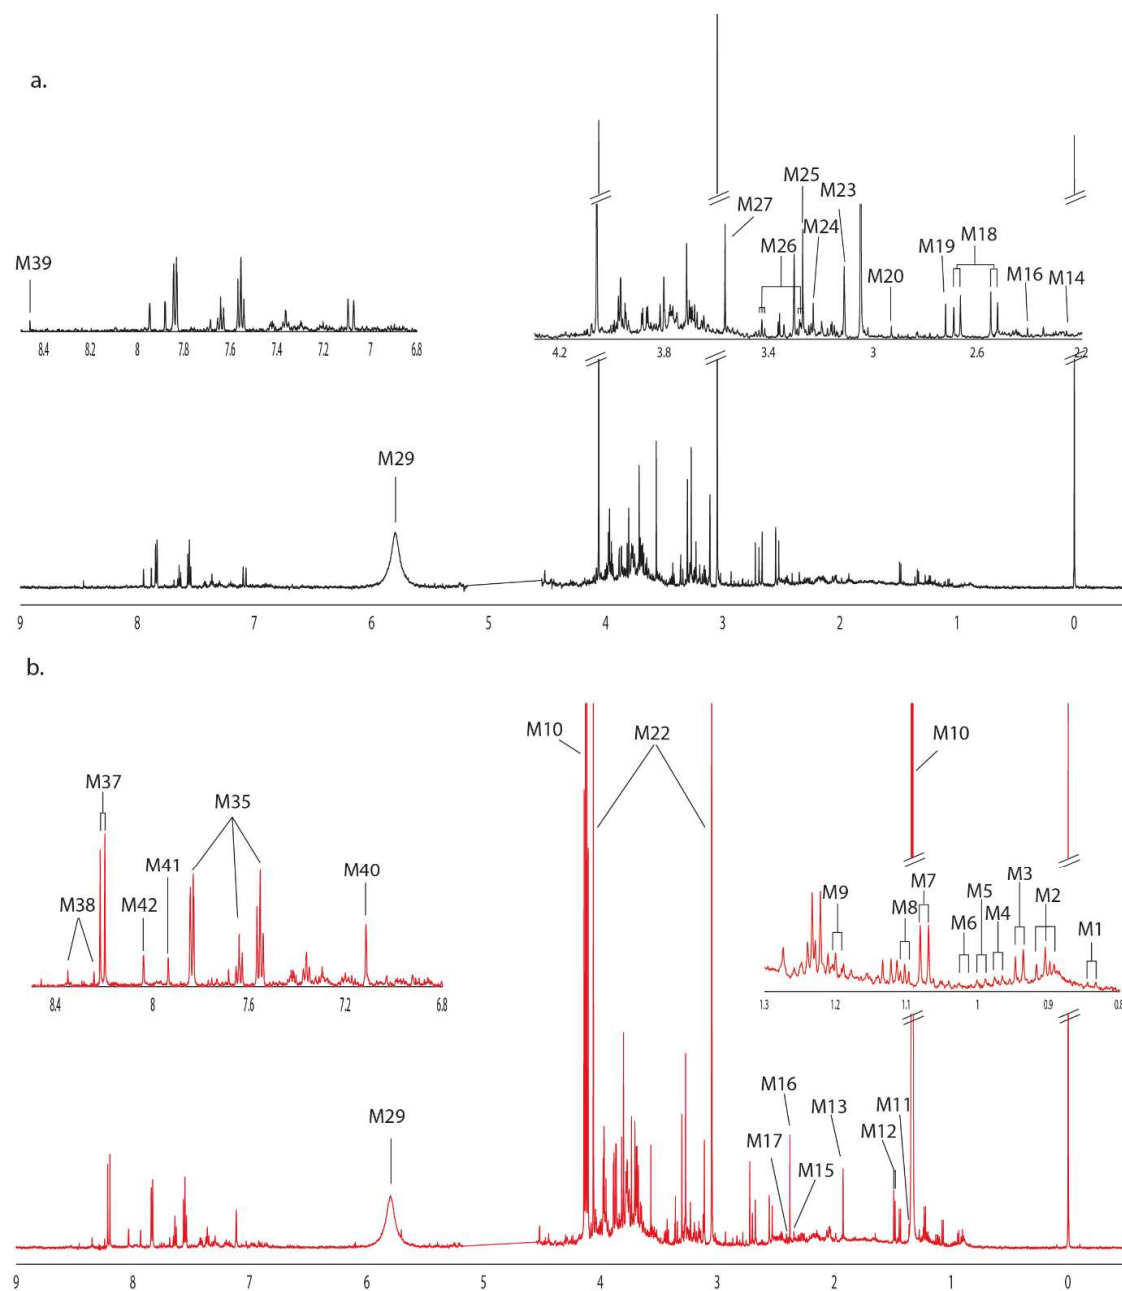

Figure S5. Median  $^1\text{H}$  NMR spectra of urine samples before (a, black), and one hour after exercise (b, red). For metabolite notation, see Table 1.



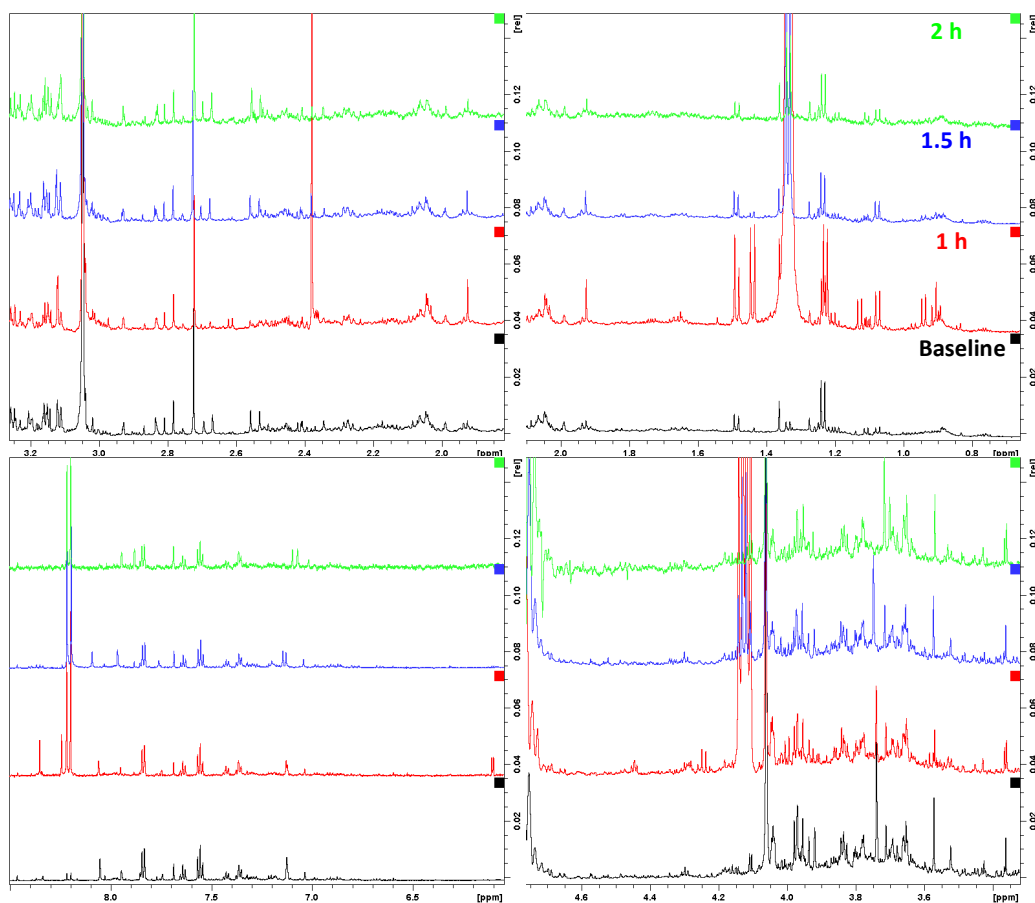

Figure S6. Characteristic  $^1\text{H}$  NMR spectral regions from the urine samples of one individual, obtained at baseline (black) and 1 (red), 1.5 (blue), as well as 2 h post-exercise (green).

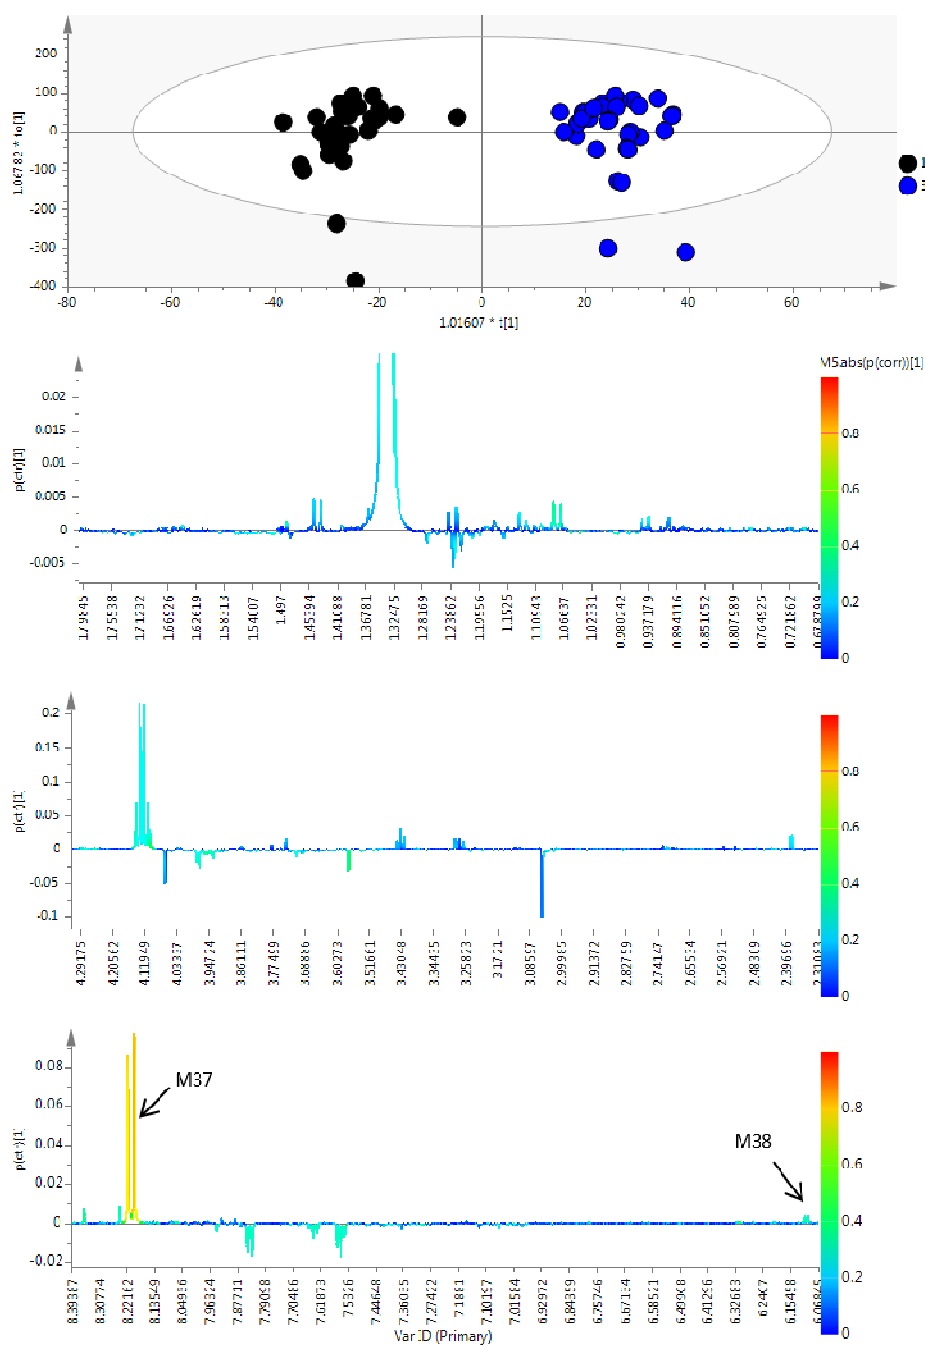

**Figure S7.** Top panel: scores plot for the OPLS-DA model on the basis of  $^1\text{H}$  NMR data, comparing baseline samples (●) with those at 1.5 h after exercise (●). Lower panels: loadings plot. Numbering corresponds to metabolites in Table 1.

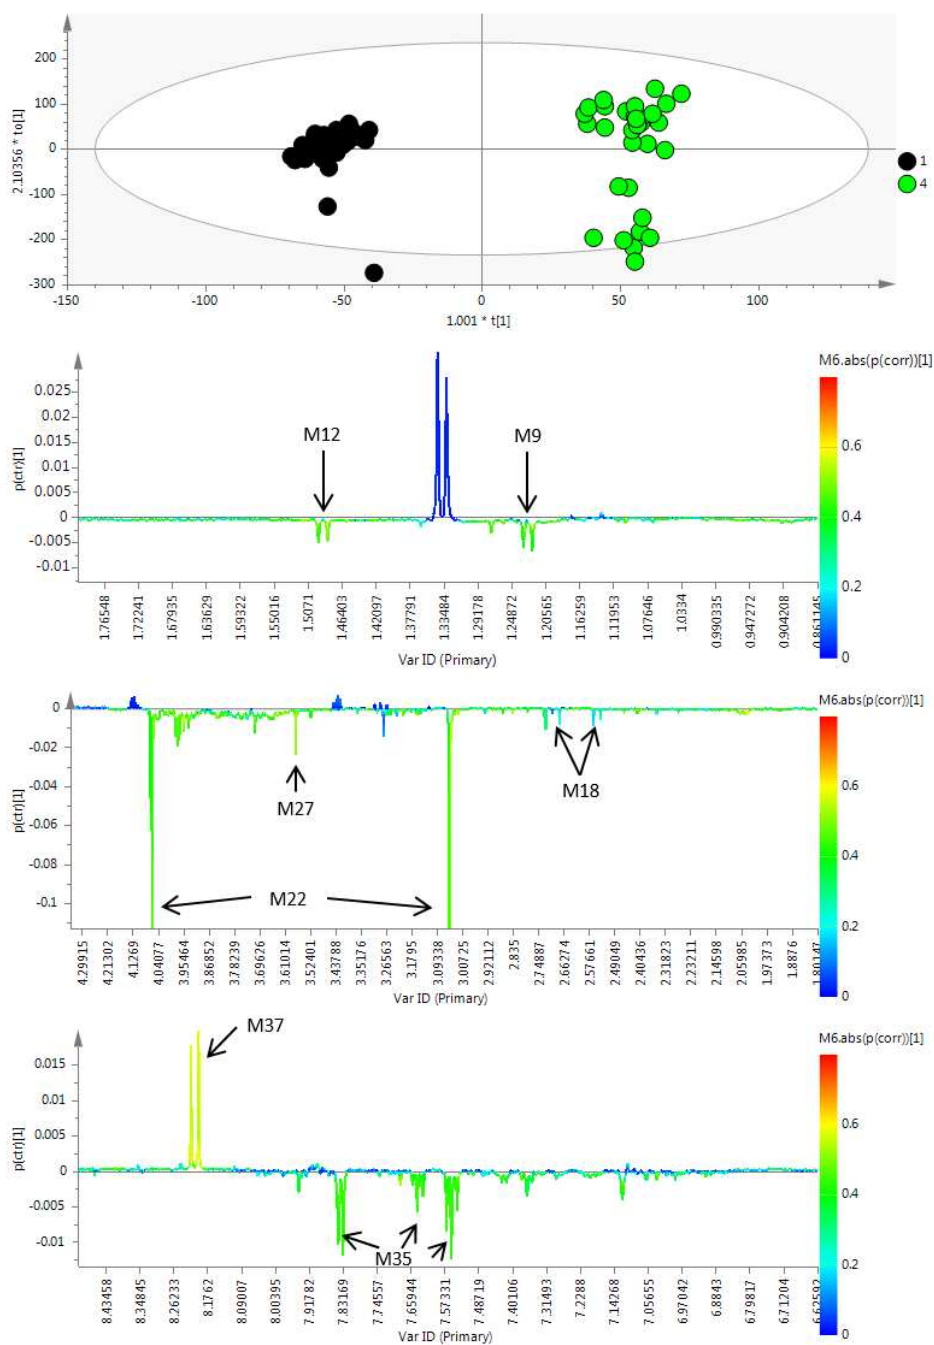

Figure S8. Top panel: scores plot for the OPLS-DA model on the basis of <sup>1</sup>H NMR data, comparing baseline samples (●) with those at 2 h after exercise (●). Lower panels: loadings plot. Numbering corresponds to metabolites in Table 1.

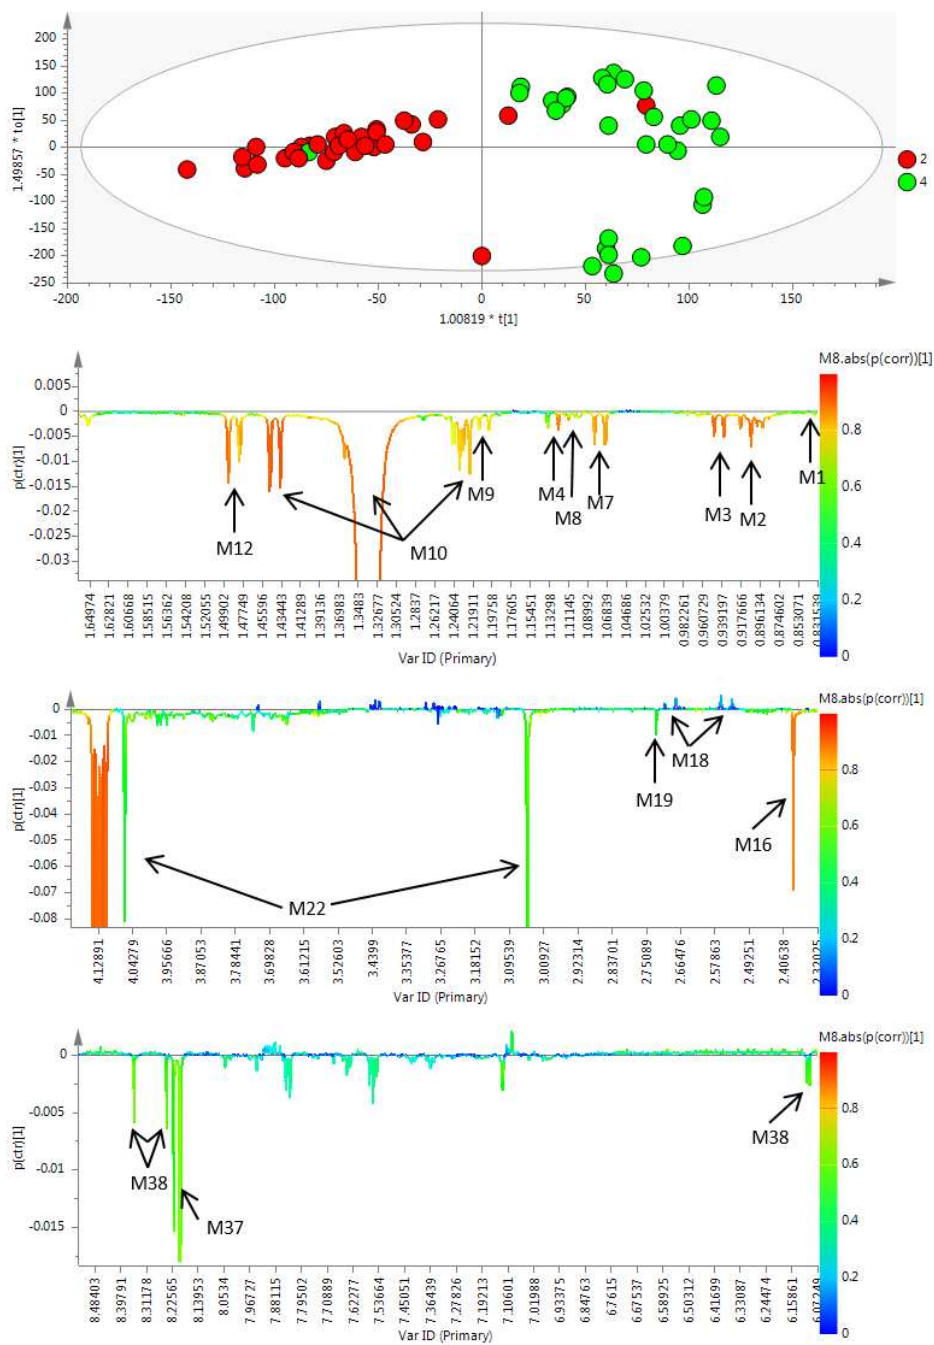

Figure S9. Top panel: scores plot for the OPLS-DA model on the basis of <sup>1</sup>H NMR data, comparing samples at 1 h (●) with those at 2 h after exercise (●). Lower panels: loadings plot. Numbering corresponds to metabolites in Table 1.
